# Supplementary material for: Population structure and spatio-temporal transmission dynamics of Plasmodium vivax after radical cure treatment in a rural village of the Peruvian Amazon
Source: PubMed Central journal article supplement (PMC3893378; doi:10.1186/1475-2875-13-8), 2014-01-06

### K populations (structure)

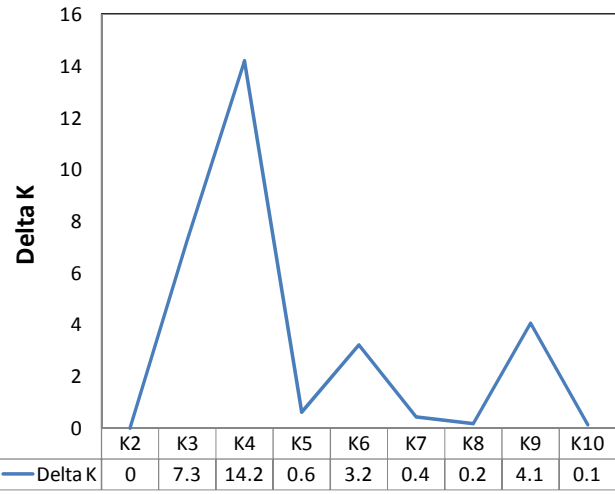

**A**

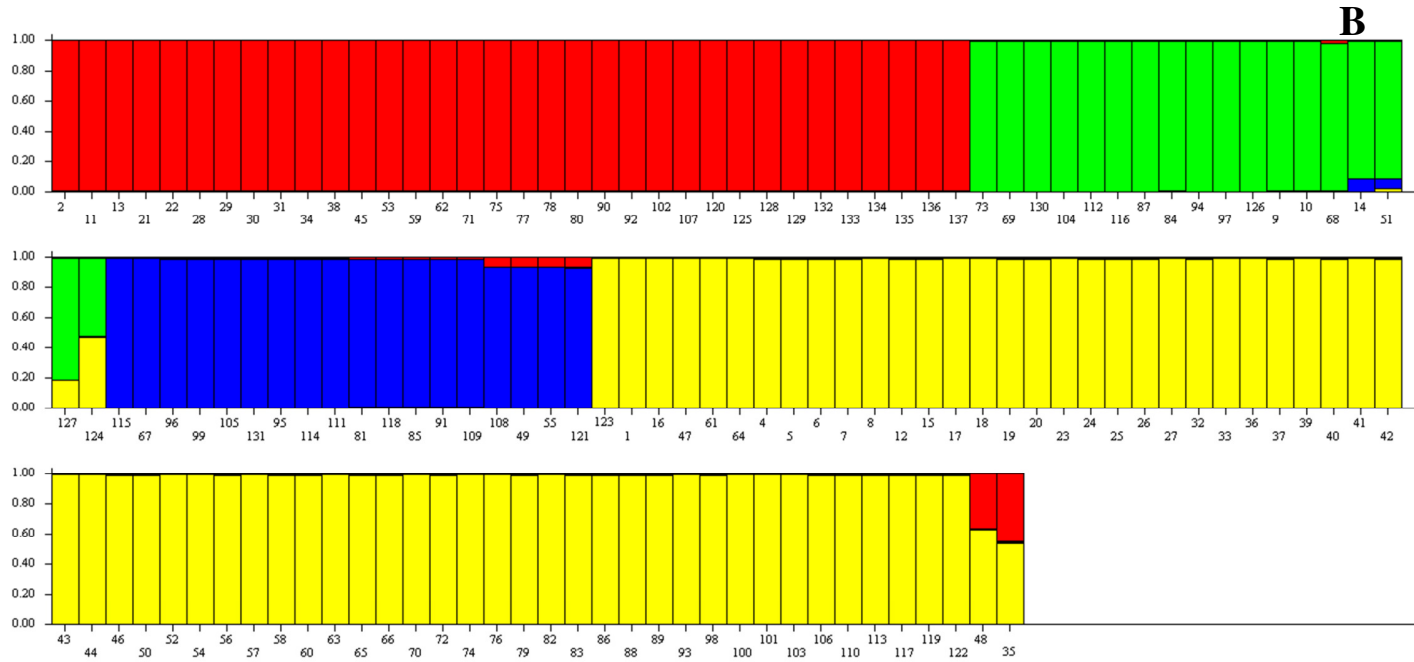

Supplement: 1475-2875-13-8-S1.pdf [file 1475-2875-13-8-S1.pdf]
