# Supplementary material for: Population structure and spatio-temporal transmission dynamics of Plasmodium vivax after radical cure treatment in a rural village of the Peruvian Amazon
Source: Malar J. 2014 Jan 6;13:8. doi: 10.1186/1475-2875-13-8 (PMC3893378; doi:10.1186/1475-2875-13-8)
Supplement: Additional file 2 — Characteristics of each malaria infection suffered by the 37 participants. X = Initial infection in this study (D0). Green shading indicates a recurrent P. vivax infection. P = patent infection. On the upper left corner of the cells is defined the haplotypes (H1…H20) or one of the symbols explained below. i = incomplete allele data, m = mixed infections (not possible to differentiate the haplotypes). ind = haplotype within a mixed infection that cannot be determined. n = P. vivax sample that did not amplified by PCR with any of the microsatellites. † Patent infection detected by microscopy but no by ssPCR (MS genotyping was not done). ‡ Pv positive by microscopy on D0 but filter paper D0 was not available. On day 1 was negative by ssPCR (MS genotyping was not performed). [file 1475-2875-13-8-S2.pdf]

| Household | Participant | 2008     |                 |                 |                 |                 |          |                 |         |          |          | 2009            |         |          |                |                |                |          |               |               |                |                |         | 2010     |                 |                |         |     |  |
|-----------|-------------|----------|-----------------|-----------------|-----------------|-----------------|----------|-----------------|---------|----------|----------|-----------------|---------|----------|----------------|----------------|----------------|----------|---------------|---------------|----------------|----------------|---------|----------|-----------------|----------------|---------|-----|--|
|           |             | Apr      | May             | Jun             | Jul             | Aug             | Sep      | Oct             | Nov     | Dec      | Jan      | Feb             | Mar     | Abr      | May            | Jun            | Jul            | Aug      | Sep           | Oct           | Nov            | Dec            | Jan     | Feb      | Mar             | Abr            | May     | Jun |  |
| I         | 001         |          |                 |                 | H5<br>X         |                 |          |                 | H5      |          |          |                 |         |          |                | H18<br>P       |                |          |               | H18<br>P      |                |                |         |          |                 |                |         |     |  |
| II        | 002         |          |                 | H5<br>ind<br>X  |                 |                 |          |                 | n       | n        |          |                 | n       |          |                | H8<br>P        |                |          |               |               |                |                |         |          |                 |                |         |     |  |
|           | 003         |          |                 | H5<br>H11<br>X  | n               |                 | n        | H11             | n       | H11      | H11      | H11             |         | n        |                |                |                | H11      |               |               |                |                |         |          |                 |                |         |     |  |
|           | 004         |          |                 |                 |                 |                 |          |                 | H7<br>X |          |          |                 |         |          | H5<br>P        | H11<br>P       |                |          |               | H11           |                | H11<br>H4<br>P |         |          |                 |                |         |     |  |
| III       | 005         |          |                 |                 | H5<br>X         |                 |          |                 | n       |          |          |                 | H11     | H11      |                |                |                |          |               | l             |                | m<br>P         |         | m<br>P   |                 |                | H4      |     |  |
| IV        | 006         |          |                 |                 | H5<br>X         |                 |          |                 |         |          |          |                 |         |          |                |                |                |          |               |               |                |                |         |          |                 |                |         |     |  |
|           | 007         |          |                 |                 | H11<br>X        |                 |          | H11<br>P        |         |          |          |                 |         |          |                |                |                |          |               |               |                |                |         |          |                 |                |         |     |  |
|           | 008         |          |                 | H5<br>H11<br>X  |                 |                 |          |                 |         |          |          |                 | H5<br>P |          | H13<br>P       | H11            |                |          |               | H12<br>P      |                | H1<br>P*       |         |          |                 |                |         |     |  |
|           | 009         |          |                 | H11<br>X        |                 |                 |          | H11<br>P        |         |          |          |                 |         | H17<br>P |                | H17<br>P       |                | H17<br>P | H17<br>P      | H17<br>P      | t<br>P         |                |         | H20<br>P |                 |                |         |     |  |
| V         | 010         |          |                 | t<br>X          |                 |                 |          |                 |         |          |          |                 |         |          |                |                |                | H11<br>P | H11<br>P      |               | H11<br>P       |                | H3<br>P |          |                 |                |         |     |  |
| VI        | 011         |          |                 | H5<br>X         |                 |                 |          |                 |         |          |          |                 |         |          |                |                |                |          |               |               |                |                |         |          |                 |                |         |     |  |
| VII       | 012         |          | H11<br>X        |                 |                 |                 | H11<br>P |                 |         |          |          |                 | H11     | H11      | H11            | H11            | H11            |          | H11           |               |                |                |         |          |                 |                |         |     |  |
| VIII      | 013         | H5<br>X  |                 | H11<br>P        |                 |                 |          |                 |         |          |          |                 |         |          | H5             |                |                |          |               |               | H4             |                |         |          |                 |                |         |     |  |
| IX        | 014         |          | H13<br>ind<br>X |                 | H5              | H5<br>P         |          |                 | n       |          |          |                 |         |          | l              | H4<br>ind<br>P |                |          | H12           |               | H12            |                | H4<br>P |          | H4<br>P         | H4<br>P        | H4<br>P |     |  |
|           | 015         |          |                 | H11<br>X        |                 | H11<br>P        |          | n               |         |          |          |                 |         |          | H5<br>P        | H4<br>P        |                |          |               |               |                |                |         |          |                 | H4<br>P        |         |     |  |
| X         | 016         |          |                 | H11<br>X        |                 |                 |          |                 |         |          |          |                 |         |          |                |                |                |          |               |               |                |                |         |          |                 |                |         |     |  |
|           | 017         |          |                 | H11<br>X        |                 |                 |          |                 |         |          |          |                 |         |          |                |                |                |          |               |               |                |                |         |          |                 |                |         |     |  |
|           | 018         |          |                 | H11<br>X        |                 |                 |          | H11<br>P        |         |          |          |                 |         |          | H6<br>P        | H4<br>ind<br>P |                | H4<br>P  | H4<br>P       |               | H4<br>ind<br>P |                | H2<br>P | H6<br>P  |                 | H4<br>ind<br>P |         |     |  |
|           | 019         |          |                 | H11<br>X        |                 | H11<br>P        | H11<br>P | t<br>P          |         |          | H11<br>P | H11<br>P        |         | H11<br>P | H11<br>P       | H11<br>P       | H2<br>P        |          |               |               |                |                |         |          |                 |                |         |     |  |
| XI        | 020         |          |                 | M<br>X          |                 |                 |          |                 |         |          |          |                 | H5<br>P |          |                |                |                |          |               |               |                |                |         |          |                 |                |         |     |  |
|           | 021         |          |                 | H11<br>X        |                 |                 |          |                 |         |          |          |                 |         |          |                |                |                |          |               |               |                |                |         |          |                 |                |         |     |  |
|           | 022         |          |                 | H11<br>X        |                 |                 |          |                 |         |          |          |                 |         |          |                |                |                |          |               |               |                |                |         |          |                 |                |         |     |  |
| XII       | 023         |          |                 | H11<br>X        |                 |                 |          |                 |         |          |          |                 |         |          | H6<br>H11<br>P |                |                |          |               |               |                |                |         |          |                 |                |         |     |  |
|           | 024         |          |                 | H5<br>X         |                 |                 |          |                 |         |          |          |                 | n       |          |                |                |                |          |               |               |                |                |         |          |                 |                |         |     |  |
| XIII      | 025         | h<br>X   |                 |                 | H11<br>P        |                 |          |                 |         |          | H7<br>P  |                 | H11     | H11      | H11            | H11            | H7<br>H11<br>P |          | H7<br>P       |               | H7<br>P        |                |         |          |                 |                |         |     |  |
| XIV       | 026         |          | H5<br>X         |                 |                 |                 |          |                 |         |          |          |                 |         |          |                |                |                |          |               |               |                |                |         |          |                 |                |         |     |  |
| XV        | 027         |          |                 | H11<br>X        |                 | H11<br>P        |          |                 |         |          | l        |                 |         |          |                |                | H15<br>P       |          |               |               | H11<br>P       |                |         |          | H11<br>ind<br>P |                |         |     |  |
|           | 028         |          |                 | H11<br>X        |                 |                 |          |                 |         |          |          |                 |         |          |                |                |                |          |               |               |                |                |         |          |                 |                |         |     |  |
|           | 029         |          |                 | H11<br>ind<br>X |                 | H11<br>ind<br>P |          | H11<br>ind<br>P |         |          |          |                 |         |          | H11<br>P       |                |                |          |               |               |                |                |         |          |                 |                |         |     |  |
| XVI       | 030         |          | H11<br>ind<br>X |                 | H11<br>ind<br>P |                 |          |                 |         |          |          |                 |         |          | H8<br>P        | H8<br>P        |                |          | H8<br>P       | H8<br>P       |                |                |         |          |                 |                |         |     |  |
| XVII      | 031         | H11<br>X |                 |                 |                 |                 |          |                 |         |          |          |                 |         |          |                |                |                |          |               |               |                |                |         |          |                 |                |         |     |  |
| XVIII     | 032         |          | H14<br>X        | H5<br>P         |                 | H5<br>ind<br>P  |          |                 |         |          |          | H5<br>ind<br>P  | m#<br>P | m#<br>P  |                | H4<br>P        |                |          |               |               |                |                |         | H4<br>P  |                 |                | H4<br>P |     |  |
|           | 033         |          | H16<br>X        |                 |                 |                 |          |                 |         |          |          | H11<br>ind<br>P |         | m<br>P   |                | H11<br>P       |                | m<br>P   |               | H11<br>P      | H11<br>P       |                |         |          |                 |                |         |     |  |
| XIX       | 034         |          |                 |                 | H11<br>X        |                 |          |                 |         |          |          |                 |         |          | H5<br>P        |                |                |          | H4<br>H5<br>P | H4<br>H5<br>P |                |                |         |          |                 |                |         |     |  |
|           | 035         |          |                 | H11<br>X        |                 |                 |          | H11<br>P        |         |          |          |                 |         |          |                |                |                |          | H11<br>P      |               |                |                |         |          |                 |                |         |     |  |
| XX        | 036         |          |                 | H4<br>X         | H9<br>P         |                 |          |                 |         | H10<br>P |          |                 |         |          |                | H4<br>P        | H2<br>P        |          | H4<br>H5<br>P |               |                | H4<br>P        |         | H4<br>P  |                 |                |         |     |  |
|           | 037         |          |                 | H19<br>X        |                 |                 |          |                 |         |          |          |                 |         |          |                | H2<br>P        |                |          |               |               |                |                |         |          |                 |                |         |     |  |
